# Supplementary material
Source: publisher figshare collection journal article supplement (https://karger.figshare.com/ndownloader/files/25659449)
Supplement: Supplementary file 1 [file 25659449]

**Supplemental Figure 1.**

**
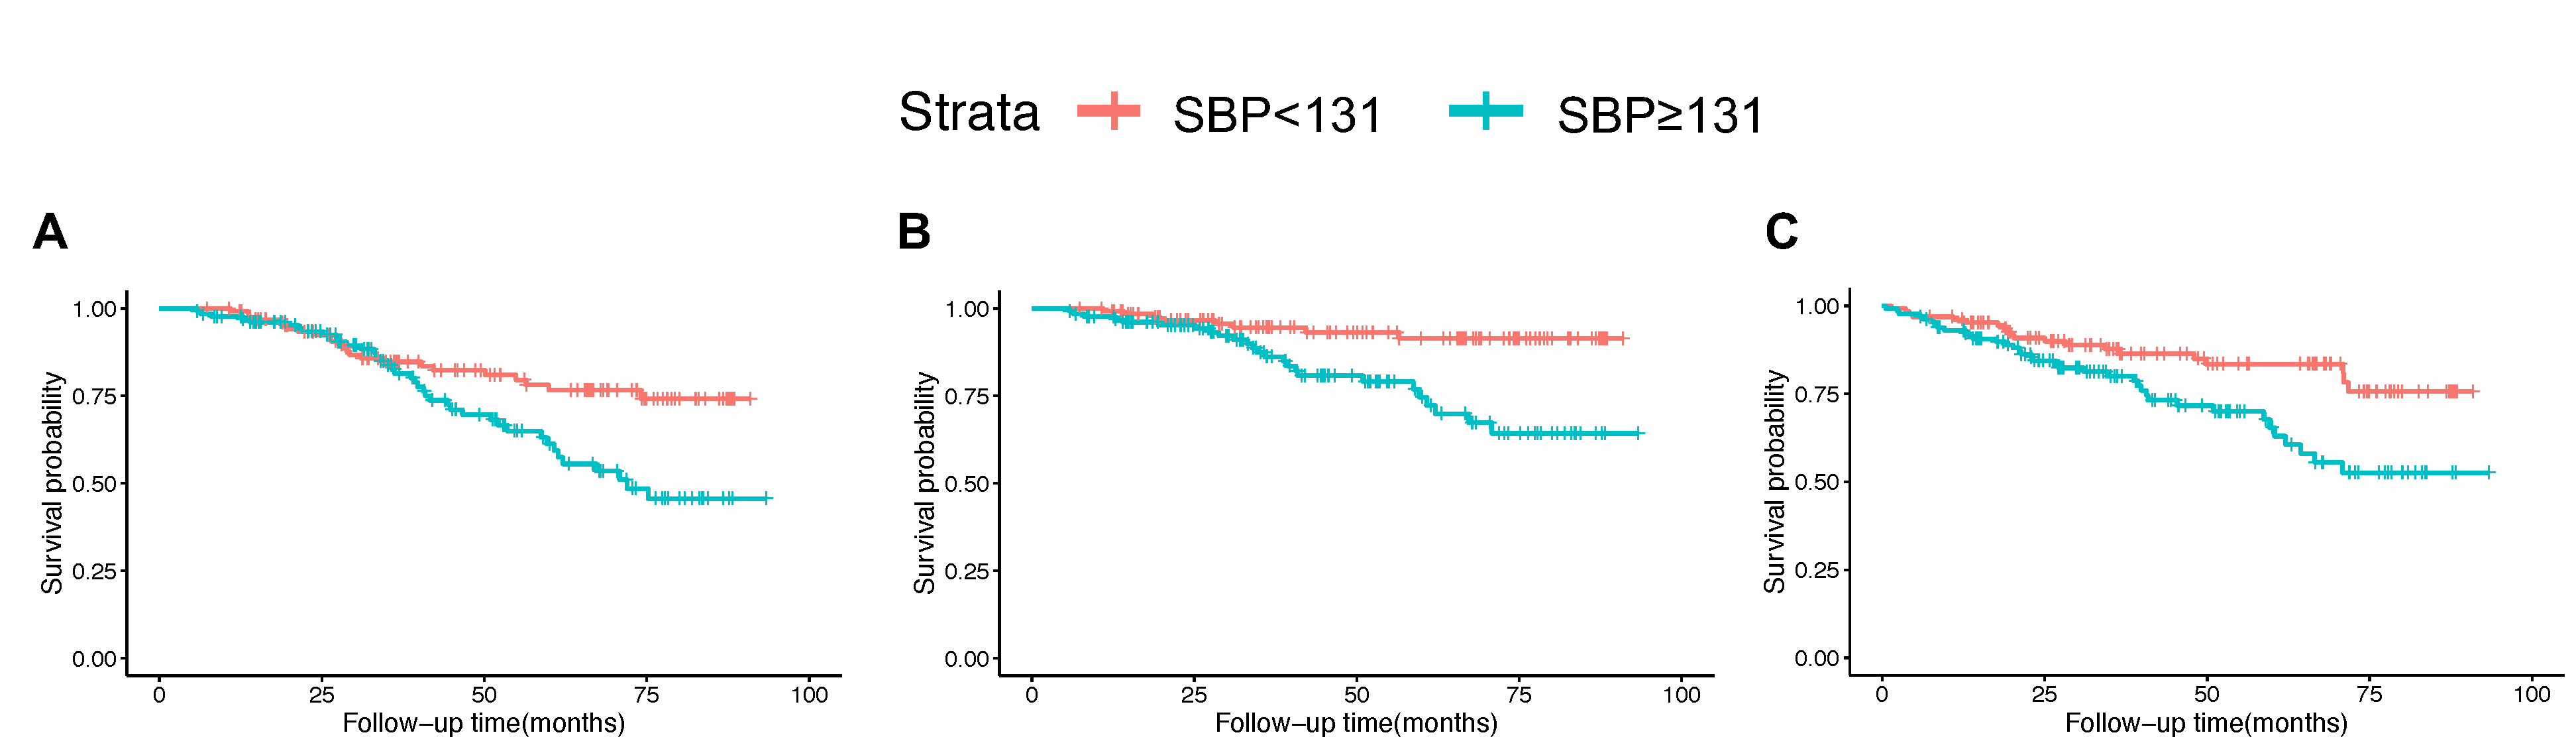
**

**Supplemental Fig. 1.** Kaplan–Meier analysis of systolic blood pressure with (A)all-cause mortality, (B)cardiovascular mortality, (C)cardiovascular events. The PD patients with higher SBP levels were associated with higher all-cause mortality(p=0.0076), cardiovascular mortality(p=0.00069) and cardiovascular events(p=0.0049). The pattern for cardiovascular mortality and cardiovascular events is more obvious than that of all-cause mortality. Abbreviation: SBP, systolic blood pressure.
